# Supplementary material
Source: MDPI journal article supplement (https://www.mdpi.com/2036-7481/15/2/53)
Supplement: s1 [file s1]

[illegible]

**Supplementary Table S2:** Culture-independent molecular approaches reveal the diversity of fungal endophytic communities in leaves of *H.binata*.

| OTU'S | PHYLUM     | CLASS               | ORDER                 | FAMILY                 | GENUS              | SPECIES                              |
|-------|------------|---------------------|-----------------------|------------------------|--------------------|--------------------------------------|
| 1     | Ascomycota | Archaeorhizomycetes | Archaeorhizomycetales | Archaeorhizomycetaceae | Archaeorhizomyces  | <i>Archaeorhizomyces</i>             |
| 2     | Ascomycota | Archaeorhizomycetes | unidentified          | unidentified           | unidentified       | <i>unidentified</i>                  |
| 3     | Ascomycota | Dothideomycetes     | Botryosphaeriales     | Botryosphaeriaceae     | Sphaeropsis        | <i>Sphaeropsis visci</i>             |
| 4     | Ascomycota | Dothideomycetes     | Capnodiales           | Dissoconiaceae         | Ramichloridium     | <i>Ramichloridium luteum</i>         |
| 5     | Ascomycota | Dothideomycetes     | Capnodiales           | Dissoconiaceae         | Dissoconium        | <i>Dissoconium aciculare</i>         |
| 6     | Ascomycota | Dothideomycetes     | Capnodiales           | Mycosphaerellaceae     | Paramycosphaerella | <i>Paramycosphaerella sticheri</i>   |
| 7     | Ascomycota | Dothideomycetes     | Capnodiales           | Mycosphaerellaceae     | Paramycosphaerella | <i>Paramycosphaerella sticheri</i>   |
| 8     | Ascomycota | Dothideomycetes     | Capnodiales           | Dissoconiaceae         | Dissoconium        | <i>Dissoconium proteae</i>           |
| 9     | Ascomycota | Dothideomycetes     | Capnodiales           | Cladosporiaceae        | Cladosporium       | <i>Cladosporium sphaerospermum</i>   |
| 10    | Ascomycota | Dothideomycetes     | Capnodiales           | Cladosporiaceae        | Cladosporium       | <i>Cladosporium sp.</i>              |
| 11    | Ascomycota | Dothideomycetes     | Capnodiales           | Mycosphaerellaceae     | Paramycosphaerella | <i>Paramycosphaerella intermedia</i> |
| 12    | Ascomycota | Dothideomycetes     | Capnodiales           | Dissoconiaceae         | Dissoconium        | <i>Dissoconium aciculare</i>         |
| 13    | Ascomycota | Dothideomycetes     | Capnodiales           | Schizothyriaceae       | Zygophiala         | <i>Zygophiala sp.</i>                |
| 14    | Ascomycota | Dothideomycetes     | Capnodiales           | Dissoconiaceae         | Uwebraunia         | <i>Uwebraunia musae</i>              |
| 15    | Ascomycota | Dothideomycetes     | Capnodiales           | Mycosphaerellaceae     | Septoria           | <i>Septoria cretae</i>               |
| 16    | Ascomycota | Dothideomycetes     | Capnodiales           | Schizothyriaceae       | Zygophiala         | <i>Zygophiala inaequalis</i>         |
| 17    | Ascomycota | Dothideomycetes     | Capnodiales           | Teratosphaeriaceae     | Devriesia          | <i>Devriesia sp.</i>                 |
| 18    | Ascomycota | Dothideomycetes     | Capnodiales           | Mycosphaerellaceae     | Paramycosphaerella | <i>Paramycosphaerella sticheri</i>   |
| 19    | Ascomycota | Dothideomycetes     | Capnodiales           | Mycosphaerellaceae     | Xenosonderhenia    | <i>Xenosonderhenia syzygii</i>       |

|    |            |                 |                |                    |                    |                                       |
|----|------------|-----------------|----------------|--------------------|--------------------|---------------------------------------|
| 20 | Ascomycota | Dothideomycetes | Capnodiales    | Cladosporiaceae    | Toxicocladosporium | <i>Toxicocladosporium strelitziae</i> |
| 21 | Ascomycota | Dothideomycetes | Capnodiales    | Dissoconiaceae     | Dissoconium        | <i>Dissoconium sp.</i>                |
| 22 | Ascomycota | Dothideomycetes | Capnodiales    | Mycosphaerellaceae | Pseudozasmidium    | <i>Pseudozasmidium vietnamense</i>    |
| 23 | Ascomycota | Dothideomycetes | Capnodiales    | Dissoconiaceae     | Uwebraunia         | <i>Uwebraunia musae</i>               |
| 24 | Ascomycota | Dothideomycetes | Capnodiales    | Dissoconiaceae     | Ramichloridium     | <i>Ramichloridium cucurbitae</i>      |
| 25 | Ascomycota | Dothideomycetes | Capnodiales    | Teratosphaeriaceae | Melanodothis       | <i>Melanodothis caricis</i>           |
| 26 | Ascomycota | Dothideomycetes | Pleosporales   | Didymellaceae      | Phoma              | <i>Phoma leveillei</i>                |
| 27 | Ascomycota | Dothideomycetes | Pleosporales   | Didymellaceae      | Didymella          | <i>Didymella macrostoma</i>           |
| 28 | Ascomycota | Dothideomycetes | Pleosporales   | Corynesporascaceae | Corynespora        | <i>Corynespora cassiicola</i>         |
| 29 | Ascomycota | Dothideomycetes | Pleosporales   | Pleosporaceae      | Alternaria         | <i>Alternaria angustiovoidea</i>      |
| 30 | Ascomycota | Dothideomycetes | Pleosporales   | Pleosporaceae      | Curvularia         | <i>Curvularia lunata</i>              |
| 31 | Ascomycota | Dothideomycetes | Pleosporales   | Pleosporaceae      | Curvularia         | <i>Curvularia geniculata</i>          |
| 32 | Ascomycota | Dothideomycetes | Pleosporales   | Pleosporaceae      | Curvularia         | <i>Curvularia americana</i>           |
| 33 | Ascomycota | Dothideomycetes | Pleosporales   | Didymosphaeriaceae | Montagnula         | <i>Montagnula scabiosae</i>           |
| 34 | Ascomycota | Dothideomycetes | Pleosporales   | Pleosporaceae      | Curvularia         | <i>Curvularia sp.</i>                 |
| 35 | Ascomycota | Dothideomycetes | Patellariales  | Patellariaceae     | Rhytidhysterion    | <i>Rhytidhysterion rufulum</i>        |
| 36 | Ascomycota | Dothideomycetes | Dothideales    | Aureobasidiaceae   | Aureobasidium      | <i>Aureobasidium pullulans</i>        |
| 37 | Ascomycota | Dothideomycetes | Dothideales    | Dothideales        | Hortaea            | <i>Hortaea werneckii</i>              |
| 38 | Ascomycota | Dothideomycetes | Dothideales    | Saccotheciaceae    | Aureobasidium      | <i>Aureobasidium thailandense</i>     |
| 39 | Ascomycota | Dothideomycetes | Venturiales    | Sympoventuriaceae  | unidentified       | <i>unidentified</i>                   |
| 40 | Ascomycota | Dothideomycetes | Mytilinidiales | Mytiliniaceae      | Lophium            | <i>Lophium arboricola</i>             |
| 41 | Ascomycota | Dothideomycetes | Pleosporales   | Pleosporaceae      | Pithomyces         | <i>Pseudopithomyces karoo</i>         |
| 42 | Ascomycota | Dothideomycetes | Pleosporales   | Phaeosphaeriaceae  | Phaeosphaeria      | <i>Phaeosphaeria ampeli</i>           |
| 43 | Ascomycota | Dothideomycetes | Pleosporales   | Periconiaceae      | Periconia          | <i>unidentified Periconia</i>         |
| 44 | Ascomycota | Dothideomycetes | Capnodiales    | Neodevriesiaceae   | Neodevriesia       | <i>Neodevriesia agapanthi</i>         |

|    |            |                 |                   |                     |                   |                                         |
|----|------------|-----------------|-------------------|---------------------|-------------------|-----------------------------------------|
| 45 | Ascomycota | Dothideomycetes | Venturiales       | Sympoventuriaceae   | Veronaeopsis      | <i>unidentified Veronaeopsis</i>        |
| 46 | Ascomycota | Dothideomycetes | Pleosporales      | Pleosporaceae       | Exserohilum       | <i>Exserohilum rostratum</i>            |
| 47 | Ascomycota | Dothideomycetes | Pleosporales      | Phaeosphaeriaceae   | Phaeosphaeria     | <i>Phaeosphaeria oryzae</i>             |
| 48 | Ascomycota | Dothideomycetes | Pleosporales      | Corynesporascaceae  | Corynespora       | <i>Corynespora cassicola</i>            |
| 49 | Ascomycota | Dothideomycetes | Mytilinidiales    | Mytiliniaceae       | Zeloasperisporium | <i>Zeloasperisporium hyphopodioides</i> |
| 50 | Ascomycota | Dothideomycetes | Pleosporales      | Coniothyriaceae     | Coniothyrium      | <i>Coniothyrium Chiangmaiense</i>       |
| 51 | Ascomycota | Dothideomycetes | Capnodiales       | Dissoconiaceae      | Ramichloridium    | <i>Ramichloridium punctatum</i>         |
| 52 | Ascomycota | Dothideomycetes | Capnodiales       | Cladosporium        | cladosporioides   | <i>Cladosporium cladosporioides</i>     |
| 53 | Ascomycota | Dothideomycetes | Pleosporales      | Didymosphaeriaceae  | Spegazzinia       | <i>Spegazzinia neosundara</i>           |
| 54 | Ascomycota | Dothideomycetes | Venturiales       | Venturiaceae        | Venturia          | <i>unidentified Venturia</i>            |
| 55 | Ascomycota | Dothideomycetes | Capnodiales       | unidentified        | unidentified      | <i>unidentified</i>                     |
| 56 | Ascomycota | Dothideomycetes | Capnodiales       | Mycosphaerellaceae  | Phaeoisariopsis   | <i>uncultured Septoria</i>              |
| 57 | Ascomycota | Dothideomycetes | Botryosphaeriales | Botryosphaeriaceae  | Phyllosticta      | <i>Phyllosticta paracapitelams</i>      |
| 58 | Ascomycota | Dothideomycetes | Pleosporales      | Bipolaris           | sorokiniana       | <i>Bipolaris sorokiniana</i>            |
| 59 | Ascomycota | Eurotiomycetes  | Eurotiales        | Aspergillaceae      | Penicillium       | <i>Penicillium paraherquei</i>          |
| 60 | Ascomycota | Eurotiomycetes  | Eurotiales        | Aspergillaceae      | Aspergillus       | <i>Aspergillus flavus</i>               |
| 61 | Ascomycota | Eurotiomycetes  | Eurotiales        | Aspergillaceae      | Penicillium       | <i>Penicillium sp.</i>                  |
| 62 | Ascomycota | Eurotiomycetes  | Eurotiales        | Trichocomaceae      | Sagenomella       | <i>Sagenomella keratitidis</i>          |
| 63 | Ascomycota | Eurotiomycetes  | Chaetothyriales   | Herpotrichiellaceae | Exophiala         | <i>Exophiala sp. 050716A</i>            |
| 64 | Ascomycota | Eurotiomycetes  | Eurotiales        | Aspergillaceae      | Aspergillus       | <i>Aspergillus sydowii</i>              |
| 65 | Ascomycota | Eurotiomycetes  | Onygenales        | Arachnomycetaceae   | Arachnomycetes    | <i>Arachnomycetes kanei</i>             |
| 66 | Ascomycota | Eurotiomycetes  | Eurotiales        | Aspergillaceae      | Aspergillus       | <i>Aspergillus sp.</i>                  |
| 67 | Ascomycota | Eurotiomycetes  | Eurotiales        | Aspergillaceae      | Penicillium       | <i>Penicillium sp.</i>                  |
| 68 | Ascomycota | Eurotiomycetes  | Eurotiales        | Trichocomaceae      | Talaromyces       | <i>Talaromyces pinophilus</i>           |
| 69 | Ascomycota | Eurotiomycetes  | Eurotiales        | Trichocomaceae      | Talaromyces       | <i>Talaromyces flavus</i>               |

|    |            |                  |                 |                     |                   |                                         |
|----|------------|------------------|-----------------|---------------------|-------------------|-----------------------------------------|
| 70 | Ascomycota | Eurotiomycetes   | Eurotiales      | Trichocomaceae      | Talaromyces       | <i>talaromyces verruculosus</i>         |
| 71 | Ascomycota | Eurotiomycetes   | Eurotiales      | Aspergillaceae      | Aspergillus       | <i>Aspergillus penicillioides</i>       |
| 72 | Ascomycota | Eurotiomycetes   | Eurotiales      | Aspergillaceae      | Aspergillus       | <i>Aspergillus penicillioides</i>       |
| 73 | Ascomycota | Eurotiomycetes   | Eurotiales      | Aspergillaceae      | Aspergillus       | <i>Aspergillus sp.</i>                  |
| 74 | Ascomycota | Eurotiomycetes   | Eurotiales      | Aspergillaceae      | Aspergillus       | <i>Aspergillus penicillioides</i>       |
| 75 | Ascomycota | Eurotiomycetes   | Onygenales      | Onygenales          | Zeloasperisporium | <i>Zeloasperisporium hyphopodioides</i> |
| 76 | Ascomycota | Eurotiomycetes   | Eurotiales      | Trichocomaceae      | Thermomyces       | <i>Thermomyces lanuginosus</i>          |
| 77 | Ascomycota | Eurotiomycetes   | Eurotiales      | Aspergillaceae      | Aspergillus       | <i>Aspergillus heterocaryoticus</i>     |
| 78 | Ascomycota | Eurotiomycetes   | Chaetothyriales | Herpotrichiellaceae | Exophiala         | <i>Exophiala pisciphila</i>             |
| 79 | Ascomycota | Eurotiomycetes   | Chaetothyriales | Herpotrichiellaceae | Cladophialophora  | <i>uncultured Cladophialophora</i>      |
| 80 | Ascomycota | Eurotiomycetes   | Eurotiales      | Trichocomaceae      | Talaromyces       | <i>Talaromyces aculeatus</i>            |
| 81 | Ascomycota | Eurotiomycetes   | Eurotiales      | Aspergillaceae      | Aspergillus       | <i>Aspergillus halophilicus</i>         |
| 82 | Ascomycota | Eurotiomycetes   | Chaetothyriales | Herpotrichiellaceae |                   |                                         |
| 83 | Ascomycota | Eurotiomycetes   | Chaetothyriales | Trichomeriaceae     | Knufia            | <i>Knufia epidermidis</i>               |
| 84 | Ascomycota | Eurotiomycetes   | Eurotiales      | Aspergillaceae      | Aspergillus       | <i>Aspergillus brasiliensis</i>         |
| 85 | Ascomycota | Eurotiomycetes   | Eurotiales      | Aspergillaceae      | Aspergillus       | <i>Aspergillus terreus</i>              |
| 86 | Ascomycota | Eurotiomycetes   | Eurotiales      | Aspergillaceae      | Penicillium       |                                         |
| 87 | Ascomycota | Eurotiomycetes   | Eurotiales      | Aspergillaceae      | Penicillium       | <i>Penicillium sp. ASR-154</i>          |
| 88 | Ascomycota | Eurotiomycetes   | Eurotiales      | Aspergillaceae      | Aspergillus       | <i>Aspergillus sydowii</i>              |
| 89 | Ascomycota | Eurotiomycetes   | Eurotiales      | Aspergillaceae      | Aspergillus       | <i>Aspergillus eburneocreus</i>         |
| 90 | Ascomycota | Eurotiomycetes   | Eurotiales      | Aspergillaceae      | Aspergillus       | <i>Aspergillus stellatus</i>            |
| 91 | Ascomycota | Eurotiomycetes   | Eurotiales      | Trichocomaceae      | Sagenomella       | <i>Sagenomella striatispora</i>         |
| 92 | Ascomycota | Eurotiomycetes   | Onygenales      | Onygenales          | Chrysosporium     | <i>Chrysosporium lobatum</i>            |
| 93 | Ascomycota | Geoglossomycetes | Geoglossales    | Geoglossaceae       | Geoglossum        | <i>Geoglossum fallax</i>                |
| 94 | Ascomycota | Leotiomycetes    | Helotiales      | Myxotrichaceae      | Oidiodendron      | <i>Oidiodendron maius</i>               |

|     |            |                 |                   |                    |                  |                                         |
|-----|------------|-----------------|-------------------|--------------------|------------------|-----------------------------------------|
| 95  | Ascomycota | Leotiomycetes   | Erysiphales       | Erysiphaceae       | Podosphaera      | <i>Podosphaera xanthii</i>              |
| 96  | Ascomycota | Leotiomycetes   | Helotiales        | Myxotrichaceae     | Oidiodendron     | <i>unidentified</i>                     |
| 97  | Ascomycota | Leotiomycetes   | Helotiales        | Myxotrichaceae     | Oidiodendron     | <i>Oidiodendron sp.</i>                 |
| 98  | Ascomycota | Leotiomycetes   | Helotiales        | Helotiaceae        | Phaeohelotium    | <i>Phaeohelotium succineoguttulatum</i> |
| 99  | Ascomycota | Leotiomycetes   | Helotiales        | Myxotrichaceae     | Oidiodendron     | <i>Oidiodendron pilicola</i>            |
| 100 | Ascomycota | Leotiomycetes   | Helotiales        | Helotiales         | Xenopolyscytalum | <i>Xenopolyscytalum pinea</i>           |
| 101 | Ascomycota | Leotiomycetes   | Thelebolales      | Pseudeurotiaceae   | Pseudeurotium    | <i>Pseudeurotium hygrophilum</i>        |
| 102 | Ascomycota | Leotiomycetes   | Helotiales        | Helotiaceae        | Tetracladium     | <i>Tetracladium setigerum</i>           |
| 103 | Ascomycota | Pezizomycetes   | Pezizales         | Pezizaceae         | Peziza           | <i>Peziza oceanica</i>                  |
| 104 | Ascomycota | Sordariomycetes | Hypocreales       | Stachybotryaceae   | Xenomyrothecium  | <i>Xenomyrothecium tongaense</i>        |
| 105 | Ascomycota | Sordariomycetes | Sordariales       | Chaetomiaceae      | Amesia           | <i>Amesia sp.</i>                       |
| 106 | Ascomycota | Sordariomycetes | Hypocreales       | Hypocreales        | Trichothecium    | <i>Trichothecium roseum</i>             |
| 107 | Ascomycota | Sordariomycetes | Xylariales        | Microdochiaceae    | Idriella         | <i>Idriella lunata</i>                  |
| 108 | Ascomycota | Sordariomycetes | Sordariales       | Chaetomiaceae      | Acrophialophora  | <i>Acrophialophora sp.</i>              |
| 109 | Ascomycota | Sordariomycetes | Xylariales        | Bartaliniaceae     | Bartalinia       | <i>Bartalinia robillardoides</i>        |
| 110 | Ascomycota | Sordariomycetes | Sordariales       | Chaetomiaceae      | Myceliophthora   | <i>Myceliophthora fergusii</i>          |
| 111 | Ascomycota | Sordariomycetes | Xylariales        | Xylariaceae        | Xylaria          | <i>Xylaria escharoidea</i>              |
| 112 | Ascomycota | Sordariomycetes | Xylariales        | Microdochiaceae    | Idriella         | <i>Idriella lunata</i>                  |
| 113 | Ascomycota | Sordariomycetes | Sordariales       | Chaetomiaceae      | Melanocarpus     | <i>Melanocarpus albomyces</i>           |
| 114 | Ascomycota | Sordariomycetes | Xylariales        | Microdochiaceae    | Microdochium     | <i>Microdochium sp.</i>                 |
| 115 | Ascomycota | Sordariomycetes | Sordariales       | Sordariaceae       | Neurospora       | <i>Neurospora intermedia</i>            |
| 116 | Ascomycota | Sordariomycetes | Xylariales        | Microdochiaceae    | Gyrothrix        | <i>Gyrothrix oleae</i>                  |
| 117 | Ascomycota | Sordariomycetes | Hypocreales       | Stachybotryaceae   | Alfaria          | <i>Alfaria sp.</i>                      |
| 118 | Ascomycota | Sordariomycetes | Trichosphaeriales | Trichosphaeriaceae | Nigrospora       | <i>Nigrospora sphaerica</i>             |
| 119 | Ascomycota | Sordariomycetes | Trichosphaeriales | Trichosphaeriaceae | Nigrospora       | <i>Nigrospora oryzae</i>                |

|     |            |                 |                   |                      |                    |                                         |
|-----|------------|-----------------|-------------------|----------------------|--------------------|-----------------------------------------|
| 120 | Ascomycota | Sordariomycetes | Sordariales       | Chaetomiaceae        | Botryotrichum      | <i>Botryotrichum atrogriseum</i>        |
| 121 | Ascomycota | Sordariomycetes | Trichosphaeriales | Trichosphaeriaceae   | Nigrospora         | <i>Nigrospora sp. WL02</i>              |
| 122 | Ascomycota | Sordariomycetes | Trichosphaeriales | Trichosphaeriaceae   | Nigrospora         | <i>Nigrospora chinensis</i>             |
| 123 | Ascomycota | Sordariomycetes | Trichosphaeriales | Trichosphaeriaceae   | Nigrospora         | <i>Nigrospora lacticolonia</i>          |
| 124 | Ascomycota | Sordariomycetes | Hypocreales       | Hypocreales          | Acremonium         | <i>Acremonium brachypenium</i>          |
| 125 | Ascomycota | Sordariomycetes | Sordariales       | Sordariaceae         | Neurospora         | <i>Uncultured Neurospora</i>            |
| 126 | Ascomycota | Sordariomycetes | Sordariales       | Chaetomiaceae        | Crassicarpon       | <i>Crassicarpon thermophilum</i>        |
| 127 | Ascomycota | Sordariomycetes | Xylariales        | Xylariaceae          | Xylaria            | <i>Xylaria psdii</i>                    |
| 128 | Ascomycota | Sordariomycetes | Xylariales        | Diatrypaceae         | Eutypella          | <i>Eutypella scoparia</i>               |
| 129 | Ascomycota | Sordariomycetes | Hypocreales       | Clavicipitaceae      | Metarhizium        | <i>Metarhizium anisopliae</i>           |
| 130 | Ascomycota | Sordariomycetes | Xylariales        | Sporocadaceae        | Pestalotiopsis     | <i>Pestalotiopsis telopeae</i>          |
| 131 | Ascomycota | Sordariomycetes | Sordariales       | Chaetomiaceae        | Trichocladium      | <i>Trichocladium arxii</i>              |
| 132 | Ascomycota | Sordariomycetes | Xylariales        | Hypoxylaceae         | Daldinia           | <i>Daldinia eschscholtzii</i>           |
| 133 | Ascomycota | Sordariomycetes | Hypocreales       | Hypocreaceae         | Trichoderma        | <i>Trichoderma harzianum</i>            |
| 134 | Ascomycota | Sordariomycetes | Glomerellales     | Glomerellaceae       | Colletotrichum     | <i>Colletotrichum viniferum</i>         |
| 135 | Ascomycota | Sordariomycetes | Hypocreales       | Hypocreaceae         | Trichoderma        | <i>Trichoderma virens</i>               |
| 136 | Ascomycota | Sordariomycetes | Glomerellales     | Plectosphaerellaceae | Acrostalagmus      | <i>Acrostalagmus luteoalbus</i>         |
| 137 | Ascomycota | Sordariomycetes | Hypocreales       | Hypocreales          | Acremonium         | <i>Acremonium hyalinulum</i>            |
| 138 | Ascomycota | Sordariomycetes | Hypocreales       | Nectriaceae          | Xenogliocladiopsis | <i>Xenogliocladiopsis cypellocarpae</i> |
| 139 | Ascomycota | Sordariomycetes | Xylariales        | Microdochiaceae      | Microdochium       | <i>Microdochium novae-zelandiae</i>     |
| 140 | Ascomycota | Sordariomycetes | Hypocreales       | Nectriaceae          | Fusarium           | <i>Fusarium oxysporum</i>               |
| 141 | Ascomycota | Sordariomycetes | Xylariales        | Amphisphaeriaceae    | Funiliomyces       | <i>Funiliomyces unidentified</i>        |
| 142 | Ascomycota | Sordariomycetes | Xylariales        | Xylariaceae          | Coniolarrella      | <i>Coniolarrella hispanica</i>          |
| 143 | Ascomycota | Sordariomycetes | Glomerellales     | Glomerellaceae       | Colletotrichum     | <i>unidentified Colletotrichum</i>      |
| 144 | Ascomycota | Sordariomycetes | Sordariales       | Lasiosphaeriaceae    | Apodus             | <i>Apodus deciduus</i>                  |
| 145 | Ascomycota | Sordariomycetes | Hypocreales       | Ophiocordycipitaceae | Purpureocillium    | <i>Purpureocillium lilacinum</i>        |

|     |            |                 |                   |                      |               |                                  |
|-----|------------|-----------------|-------------------|----------------------|---------------|----------------------------------|
| 146 | Ascomycota | Sordariomycetes | Hypocreales       | Cordycipitaceae      | Cordyceps     | <i>Cordyceps bassiana</i>        |
| 147 | Ascomycota | Sordariomycetes | Xylariales        | Xylariales           | Hansfordia    | <i>Hansfordia pulvinata</i>      |
| 148 | Ascomycota | Sordariomycetes | Hypocreales       | Ophiocordycipitaceae | Hirsutella    | <i>Hirsutella thompsonii</i>     |
| 149 | Ascomycota | Sordariomycetes | Hypocreales       | Stachybotryaceae     | Myrothecium   | <i>Myrothecium sp.</i>           |
| 150 | Ascomycota | Sordariomycetes | Sordariales       | Lasiosphaeriaceae    | Cladorrhinum  |                                  |
| 151 | Ascomycota | Sordariomycetes | Microascales      | Microascaceae        | Lophotrichus  | <i>Lophotrichus fimeti</i>       |
| 152 | Ascomycota | Sordariomycetes | Sordariales       | Chaetomiaceae        | Zopfiella     | <i>uncultured Zopfiella</i>      |
| 153 | Ascomycota | Sordariomycetes | Sordariales       | Chaetomiaceae        | Zopfiella     | <i>Zopfiella marina</i>          |
| 154 | Ascomycota | Sordariomycetes | Hypocreales       | Hypocreaceae         | Trichoderma   | <i>uncultured Trichoderma</i>    |
| 155 | Ascomycota | Sordariomycetes | Pleosporales      | Pleosporaceae        | Alternaria    | <i>Alternaria macrospora</i>     |
| 156 | Ascomycota | Sordariomycetes | Pleosporales      | Pleosporaceae        | Edenia        | <i>Edenia gomezpompae</i>        |
| 157 | Ascomycota | Sordariomycetes | Sordariales       | Chaetomiaceae        | Crassicarpon  | <i>Crassicarpon thermophilum</i> |
| 158 | Ascomycota | Sordariomycetes | Xylariales        | Xylariaceae          | Xylariaceae   | <i>Xylariaceae sp. PSU-ES116</i> |
| 159 | Ascomycota | Sordariomycetes | Xylariales        | Microdochiaceae      | Microdochium  |                                  |
| 160 | Ascomycota | Sordariomycetes | Hypocreales       | Stachybotryaceae     | Myrothecium   | <i>Myrothecium sp.</i>           |
| 161 | Ascomycota | Sordariomycetes | Diaporthales      | Diaporthaceae        | Diaporthe     | <i>Diaporthe biconispora</i>     |
| 162 | Ascomycota | Sordariomycetes | Sordariales       | Sordariaceae         | Sordaria      | <i>Sordaria fimicola</i>         |
| 163 | Ascomycota | Sordariomycetes | Microascales      | Microascaceae        | Microascus    | <i>Microascus murinus</i>        |
| 164 | Ascomycota | Sordariomycetes | Xylariales        | Sporocadaceae        | Bartalinia    | <i>Bartalinia pondoensis</i>     |
| 165 | Ascomycota | Sordariomycetes | Xylariales        | Sporocadaceae        | Dicyma        | <i>Dicyma pulvinata</i>          |
| 166 | Ascomycota | Sordariomycetes | Xylariales        | Sporocadaceae        | Gyrothrix     | <i>Gyrothrixverticiclada</i>     |
| 167 | Ascomycota | Sordariomycetes | Sordariales       | Chaetomiaceae        | Trichocladium | <i>Trichocladium opacum</i>      |
| 168 | Ascomycota | Sordariomycetes | Hypocreales       | Hypocreaceae         | Trichoderma   | <i>Trichoderma harzianum</i>     |
| 169 | Ascomycota | Sordariomycetes | Hypocreales       | Nectriaceae          | Fusarium      | <i>Fusarium solani</i>           |
| 170 | Ascomycota | Sordariomycetes | Hypocreales       | Nectriaceae          | Fusarium      | <i>Fusarium fujikuroi</i>        |
| 171 | Ascomycota | Sordariomycetes | Trichosphaeriales | Trichosphaeriaceae   | Nigrospora    | <i>Nigrospora sp.</i>            |

|     |               |                      |                   |                    |                 |                                   |
|-----|---------------|----------------------|-------------------|--------------------|-----------------|-----------------------------------|
| 172 | Ascomycota    | Sordariomycetes      | Hypocreales       | Nectriaceae        | Gibberella      | <i>Gibberella intricans</i>       |
| 173 | Ascomycota    | Sordariomycetes      | Microascales      | Microascaceae      | Kernia          | <i>Kernia geniculotricha</i>      |
| 174 | Ascomycota    | Sordariomycetes      | Sordariales       | Chaetomiaceae      | Humicola        | <i>Humicola olivacea</i>          |
| 175 | Ascomycota    | Sordariomycetes      | Sordariales       | Chaetomiaceae      | Zopfiella       | <i>Zopfiella marina</i>           |
| 176 | Ascomycota    | Sordariomycetes      | Hypocreales       | Hypocreaceae       | Trichoderma     | <i>Trichoderma virilente</i>      |
| 177 | Ascomycota    | Sordariomycetes      | Sordariales       | Lasiosphaeriaceae  | Triangularia    | <i>Triangularia mangelotii</i>    |
| 178 | Ascomycota    | Saccharomycetes      | Saccharomycetales | Metschnikowiaceae  | Kodamaea        | <i>Kodamaea ohmeri</i>            |
| 179 | Ascomycota    | Saccharomycetes      | Saccharomycetales | Saccharomycetales  | Candida         | <i>Candida tropicalis</i>         |
| 180 | Ascomycota    | Saccharomycetes      | Saccharomycetales | Saccharomycetales  | Candida         | <i>Candida albicans</i>           |
| 181 | Ascomycota    | Saccharomycetes      | Saccharomycetales | Debaryomycetaceae  | Meyerozyma      | <i>unidentified Meyerozyma</i>    |
| 182 | Ascomycota    | Saccharomycetes      | Saccharomycetales | Pichiaceae         | Pichia          | <i>Pichia membranifaciens</i>     |
| 183 | Ascomycota    | Saccharomycetes      | Saccharomycetales | Saccharomycetales  | Starmerella     | <i>Starmerella etchellsii</i>     |
| 184 | Ascomycota    | Saccharomycetes      | Saccharomycetales | Debaryomycetaceae  | Debaryomyces    | <i>Debaryomyces prosopidis</i>    |
| 185 | Ascomycota    | Saccharomycetes      | Saccharomycetales | Saccharomycetales  | Candida         | <i>Candida ethanolica</i>         |
| 186 | Ascomycota    | Saccharomycetes      | Saccharomycetales | Saccharomycetales  | Candida         | <i>Candida ethanolica</i>         |
| 187 | Ascomycota    | Saccharomycetes      | Saccharomycetales | Dipodascaceae      | Geotrichum      | <i>Geotrichum candidum</i>        |
| 188 | Ascomycota    | Saccharomycetes      | Saccharomycetales | Saccharomycetales  | Candida         | <i>Candida parapsilosis</i>       |
| 189 | Ascomycota    | Saccharomycetes      | Saccharomycetales | Saccharomycetales  | Candida         | <i>Candida tibetensis</i>         |
| 190 | Ascomycota    | Saccharomycetes      | Saccharomycetales | Dipodascaceae      | Starmerella     | <i>Starmerella etchellsii</i>     |
| 191 | Ascomycota    | Saccharomycetes      | Saccharomycetales | Saccharomycetaceae | Issatchenkia    | <i>Issatchenkia orientalis</i>    |
| 192 | Ascomycota    | Saccharomycetes      | Saccharomycetales | Pichiaceae         | Pichia          | <i>Pichia mandshurica</i>         |
| 193 | Basidiomycota | Agaricostilbomycetes | Agaricostilbales  | Agaricostilbaceae  | Sterigmatomyces | <i>Sterigmatomyces halophilus</i> |
| 194 | Basidiomycota | Agaricomycetes       | Thelephorales     | Thelephoraceae     | Tomentella      | <i>Tomentella sublilacina</i>     |
| 195 | Basidiomycota | Agaricomycetes       | Cantharellales    | Ceratobasidiaceae  | Rhizoctonia     | <i>Rhizoctonia solani</i>         |
| 196 | Basidiomycota | Agaricomycetes       | Cantharellales    | Ceratobasidiaceae  | Rhizoctonia     | <i>unidentified</i>               |
| 197 | Basidiomycota | Agaricomycetes       | Polyporales       | Fomitopsidaceae    | Fomitopsis      | <i>Fomitopsis pinicola</i>        |

|     |               |                     |                        |                   |                |                                    |
|-----|---------------|---------------------|------------------------|-------------------|----------------|------------------------------------|
| 198 | Basidiomycota | Agaricomycetes      | Russulales             | Russulales        | Russulales sp. | <i>Russulales sp.</i>              |
| 199 | Basidiomycota | Agaricomycetes      | Agaricomycetes         | Agaricomycetes    | Xenasmatella   | <i>unidentified</i>                |
| 200 | Basidiomycota | Agaricomycetes      | Hymenochaetales        | unidentified      | unidentified   | <i>unidentified</i>                |
| 201 | Basidiomycota | Agaricomycetes      | Polyporales            | Ganodermataceae   | Ganoderma      |                                    |
| 202 | Basidiomycota | Agaricomycetes      | Polyporales            | Ganodermataceae   | Ganoderma      | <i>Ganoderma destructans</i>       |
| 203 | Basidiomycota | Agaricomycetes      | Agaricales             | Tricholomataceae  | Laccaria       | <i>Laccaria lateritia</i>          |
| 204 | Basidiomycota | Agaricomycetes      | Agaricales             | Psathyrellaceae   | Parasola       |                                    |
| 205 | Basidiomycota | Agaricomycetes      | Trechisporales         | Hydnodontaceae    | Trechispora    | <i>unidentified</i>                |
| 206 | Basidiomycota | Agaricomycetes      | Auriculariales         | Exidiaceae        | Eichleriella   | <i>Eichleriella tenuicula</i>      |
| 207 | Basidiomycota | Agaricomycetes      | Trechisporales         | unidentified      | unidentified   | <i>unidentified</i>                |
| 208 | Basidiomycota | Agaricomycetes      | Tremellodendropsidales | unidentified      | unidentified   | <i>unidentified</i>                |
| 209 | Basidiomycota | Agaricomycetes      | Agaricales             | Psathyrellaceae   | Coprinellus    | <i>Coprinellus radians</i>         |
| 210 | Basidiomycota | Agaricomycetes      | Agaricales             | Psathyrellaceae   | Parasola       |                                    |
| 211 | Basidiomycota | Agaricomycetes      | Auriculariales         | Exidiaceae        | Heterochaete   | <i>Heterochaete shearii</i>        |
| 212 | Basidiomycota | Cystobasidiomycetes | Cystobasidiales        | Cystobasidiaceae  | Cystobasidium  | <i>unidentified</i>                |
| 213 | Basidiomycota | Cystobasidiomycetes | Cystobasidiales        | Symmetrosporaceae | Symmetrospora  | <i>Symmetrospora sp. CBS 10199</i> |
| 214 | Basidiomycota | Cystobasidiomycetes | Cystobasidiales        | Cystobasidiaceae  | Cystobasidium  | <i>Cystobasidium oligophagum</i>   |
| 215 | Basidiomycota | Exobasidiomycetes   | Tilletiales            | Tilletiaceae      | Tilletia       | <i>Tilletia savilei</i>            |
| 216 | Basidiomycota | Malasseziomycetes   | Malasseziales          | Malasseziaceae    | Malassezia     | <i>Malassezia japonica</i>         |
| 217 | Basidiomycota | Malasseziomycetes   | Malasseziales          | Malasseziaceae    | Malassezia     | <i>Malassezia restricta</i>        |
| 218 | Basidiomycota | Microbotryomycetes  | Sporidiobolales        | Sporidiobolaceae  | Rhodotorula    | <i>Rhodotorula mucilaginosa</i>    |
| 219 | Basidiomycota | Microbotryomycetes  | Leucosporidiales       | Leucosporidiaceae | Leucosporidium | <i>Leucosporidium scottii</i>      |
| 220 | Basidiomycota | Microbotryomycetes  | Sporidiobolales        | Sporidiobolaceae  | Rhodotorula    | <i>Rhodotorula mucilaginosa</i>    |
| 221 | Basidiomycota | Mortierellomycetes  | Mortierellales         | Mortierellaceae   | Mortierella    | <i>Mortierella amoeboides</i>      |
| 222 | Basidiomycota | Wallemiomycetes     | Wallemiales            | Wallemiaceae      | Wallemia       | <i>Wallemia tropicalis</i>         |
| 223 | Basidiomycota | Tremellomycetes     | Trichosporonales       | Trichosporonaceae | Trichosporon   | <i>Trichosporon asahii</i>         |

|     |                   |                    |                  |                       |                     |                                     |
|-----|-------------------|--------------------|------------------|-----------------------|---------------------|-------------------------------------|
| 224 | Basidiomycota     | Tremellomycetes    | Tremellales      | Bulleribasidiaceae    | Vishniacozyma       | <i>Vishniacozyma taibaiensis</i>    |
| 225 | Basidiomycota     | Tremellomycetes    | Tremellales      | Bulleribasidiaceae    | Hannaella           | <i>Hannaella pagnoccae</i>          |
| 226 | Basidiomycota     | Tremellomycetes    | Tremellales      | Bulleribasidiaceae    | Hannaella           | <i>Hannaella pagnoccae</i>          |
| 227 | Basidiomycota     | Tremellomycetes    | Filobasidiales   | Filobasidiaceae       | Naganishia          | <i>Naganishia diffluens</i>         |
| 228 | Basidiomycota     | Tremellomycetes    | Trichosporonales | Trichosporonaceae     | Cutaneotrichosporon | <i>Cutaneotrichosporon mucoides</i> |
| 229 | Basidiomycota     | Tremellomycetes    | Tremellales      | Trimorphomycetaceae   | Saitozyma           | <i>Saitozyma podzolica</i>          |
| 230 | Basidiomycota     | Tremellomycetes    | Trichosporonales | Trichosporonaceae     | Apiotrichum         | <i>Apiotrichum laibachii</i>        |
| 231 | Basidiomycota     | Tremellomycetes    | Tremellales      | Trimorphomycetaceae   | Saitozyma           | <i>Saitozyma flava</i>              |
| 232 | Basidiomycota     | Tremellomycetes    | Tremellales      | Bulleribasidiaceae    | Hannaella           | <i>Hannaella pagnoccae</i>          |
| 233 | Basidiomycota     | Tremellomycetes    | Tremellales      | Bulleribasidiaceae    | Vishniacozyma       | <i>Vishniacozyma taibaiensis</i>    |
| 234 | Basidiomycota     | Tremellomycetes    | Tremellales      | Trimorphomycetaceae   | Saitozyma           | <i>Saitozyma flava</i>              |
| 235 | Basidiomycota     | Tremellomycetes    | Tremellales      | Rhynchogastremataceae | Papiliotrema        |                                     |
| 236 | Basidiomycota     | Tremellomycetes    | Tremellales      | Bulleribasidiaceae    | Dioszegia           |                                     |
| 237 | Basidiomycota     | Tremellomycetes    | Tremellales      | Bulleribasidiaceae    | Hannaella           | <i>Hannaella pagnoccae</i>          |
| 238 | Basidiomycota     | Tremellomycetes    | Tremellales      | Bulleribasidiaceae    | Vishniacozyma       | <i>Vishniacozyma taibaiensis</i>    |
| 239 | Basidiomycota     | Ustilaginomycetes  | Ustilaginales    | Ustilaginaceae        | Dirkmeia            | <i>Dirkmeia churashimaensis</i>     |
| 240 | Basidiomycota     | Blastocladiomycota |                  | Blastocladiomycetes   | Blastocladales      | <i>Catenariaceae</i>                |
| 241 | Glomeromycota     | Glomeromycetes     | Diversisporales  | Diversisporaceae      | Diversispora        | <i>unidentified</i>                 |
| 242 | Glomeromycota     | Glomeromycetes     | Gigasporales     | Gigasporaceae         | Scutellospora       |                                     |
| 243 | Glomeromycota     | Glomeromycetes     | Glomerales       | Glomeraceae           | Rhizophagus         | <i>Rhizophagus irregularis</i>      |
| 244 | Mortierellomycota | Mortierellomycetes | Mortierellales   | Mortierellaceae       | Mortierella         | <i>Mortierella humilis</i>          |
| 245 | Mortierellomycota | Mortierellomycetes | Mortierellales   | Mortierellaceae       | Mortierella         |                                     |
| 246 | Mortierellomycota | Mortierellomycetes | Mortierellales   | Mortierellaceae       | Mortierella         | <i>Mortierella minutissima</i>      |
