# Supplementary material
Source: MDPI journal article supplement (https://www.mdpi.com/2036-7481/15/2/53)

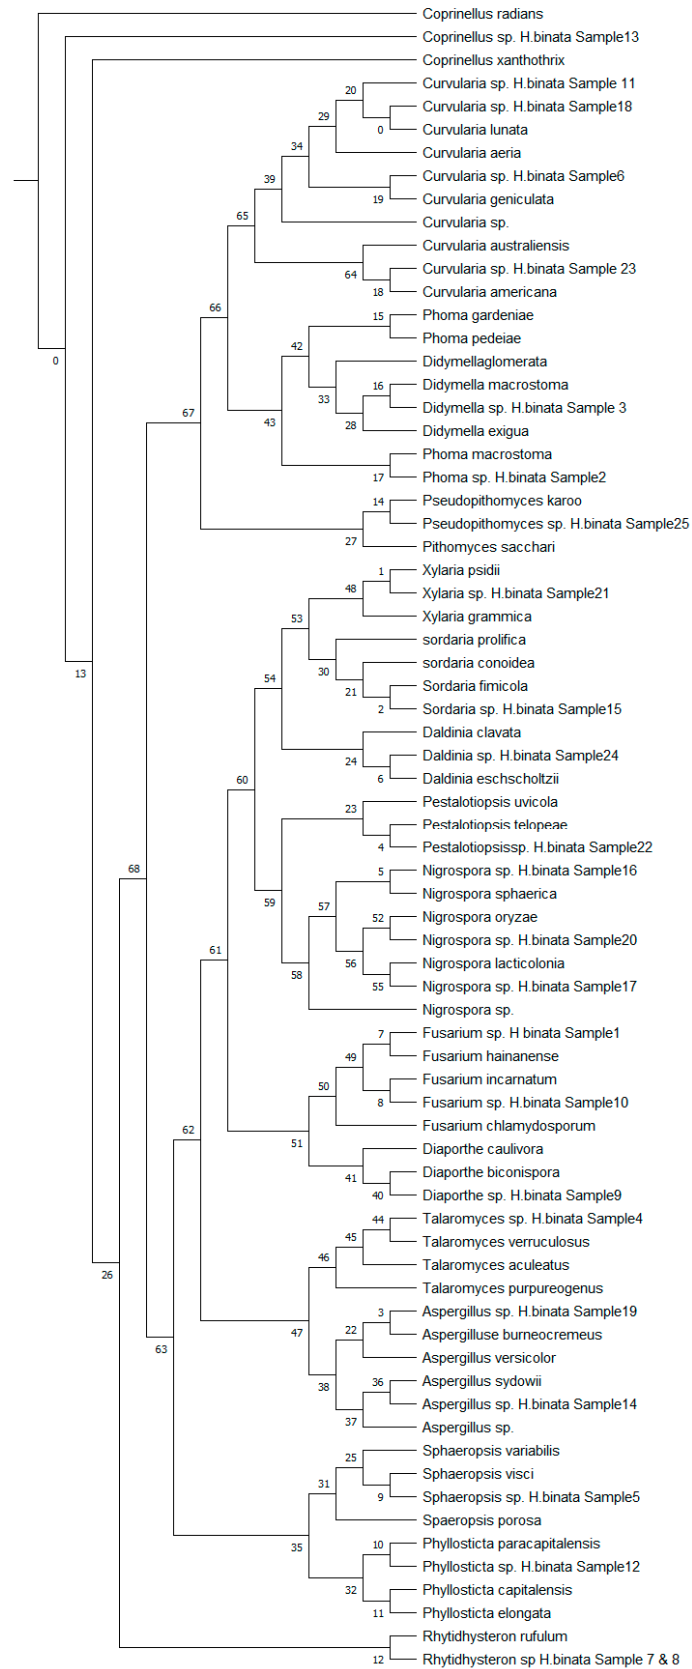

**Supplementary Figure S1: ITS2 Secondary structure predicted phylogenetic tree of *H. binata***

Supplement: s1 [file s1]
